# Supplementary material
Source: PubMed Central journal article supplement (PMC2154480)

## B. Thermotolerance of animals overexpressing *sir-2.1*

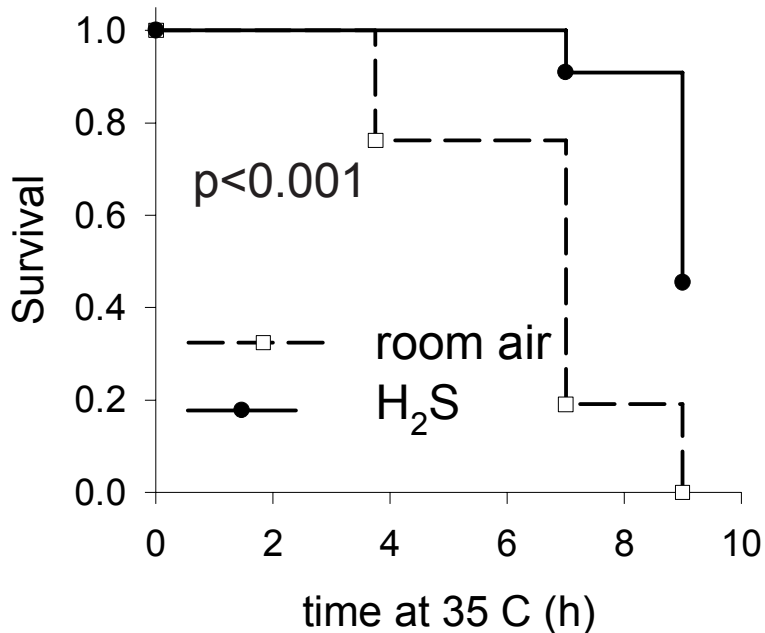

## A. *sir-2.1* transcript levels in H<sub>2</sub>S-treated animals

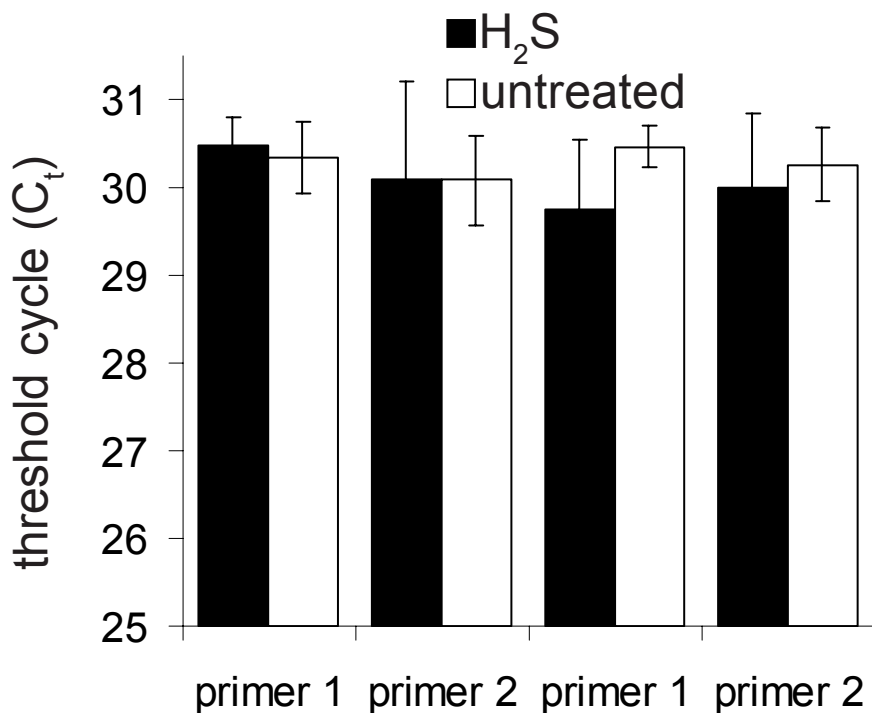

Supplement: supp_0710191104_10191Fig8.pdf [file supp_0710191104_10191Fig8.pdf]
