# Supplementary material
Source: PubMed Central journal article supplement (PMC2154480)

# A. Schematic of Experimental System

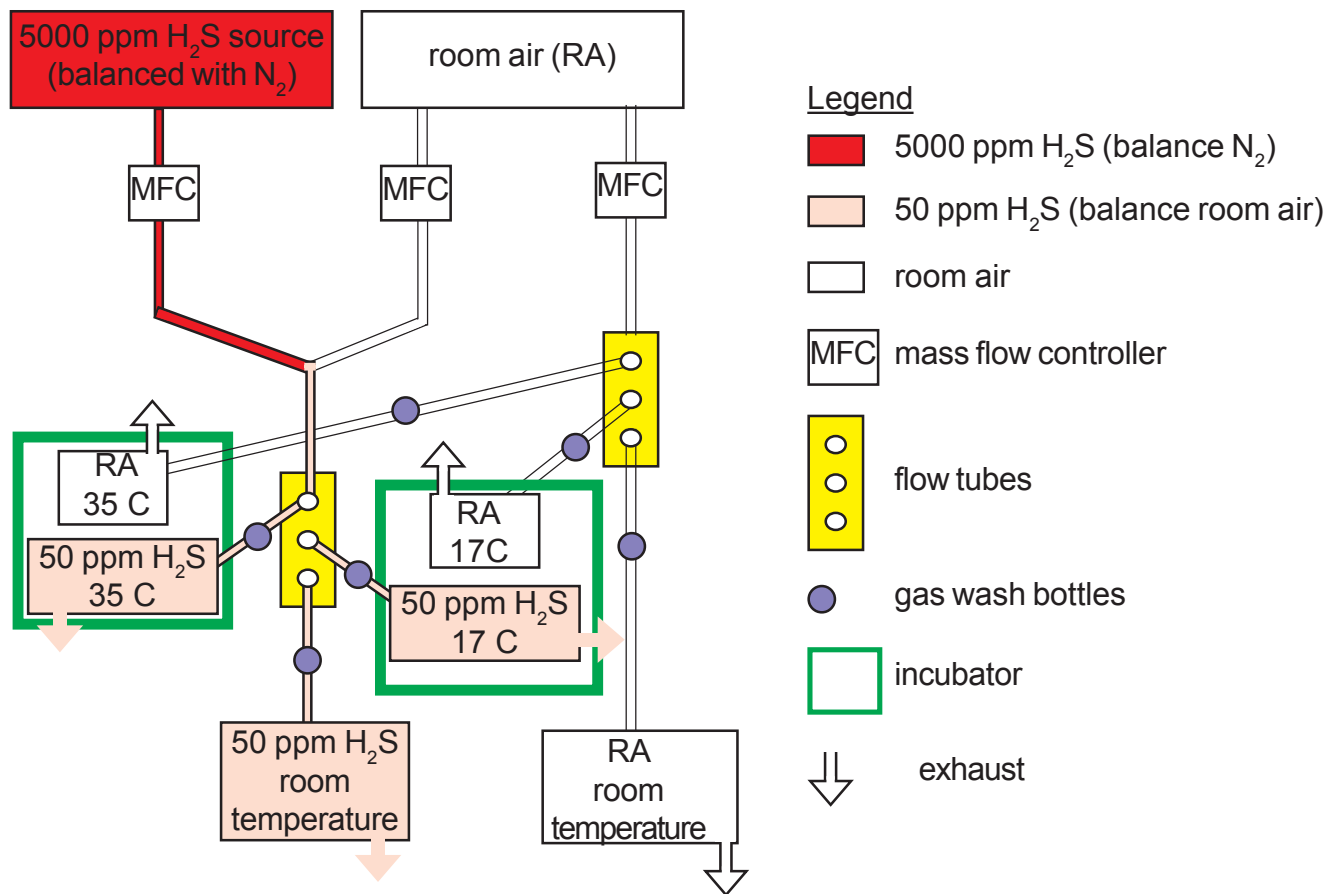

# B. Stability of 50 ppm H<sub>2</sub>S in room air

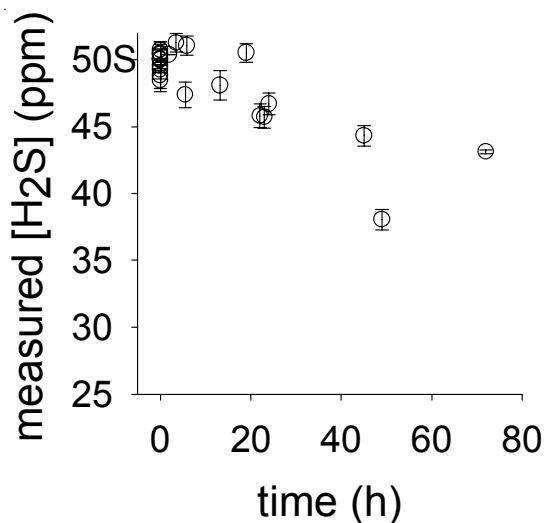

Supplement: supp_0710191104_10191Fig5.pdf [file supp_0710191104_10191Fig5.pdf]

A. *hsp-16.2::GFP*

H<sub>2</sub>S

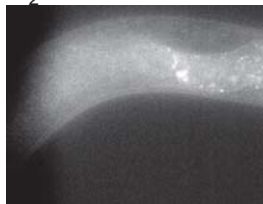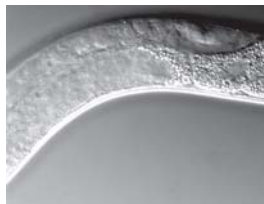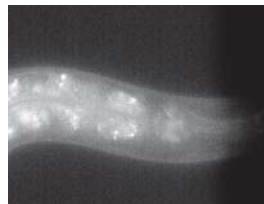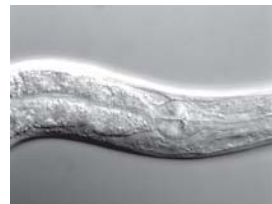

untreated

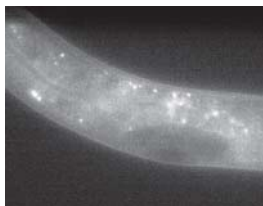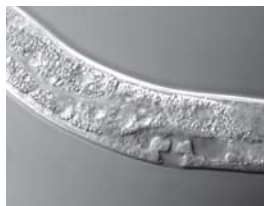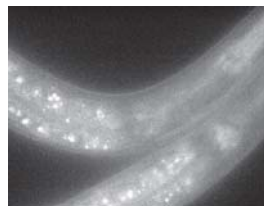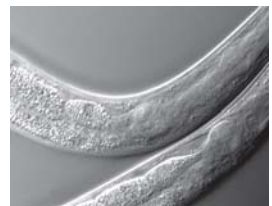

heat shock

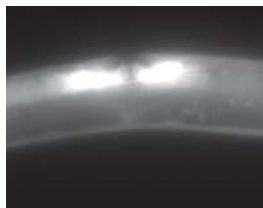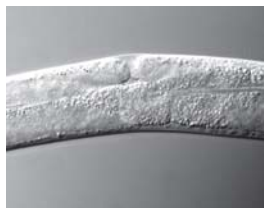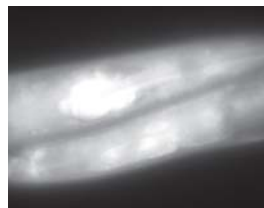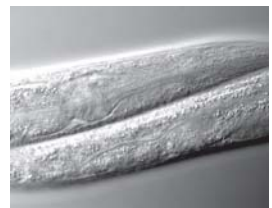

B. *hsp-4::GFP*

H<sub>2</sub>S

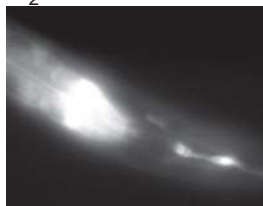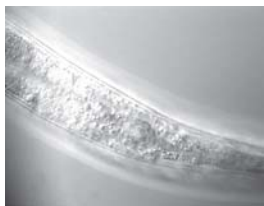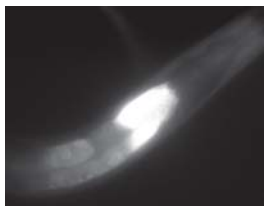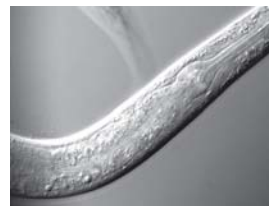

untreated

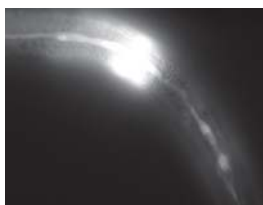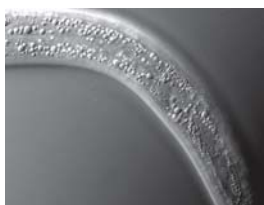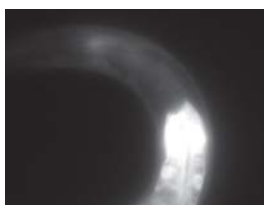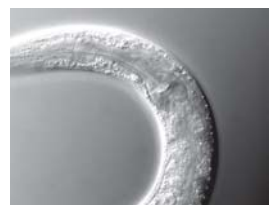

Supplement: supp_0710191104_10191Fig6.pdf [file supp_0710191104_10191Fig6.pdf]

# A. $H_2S$ -induced thermotolerance is robust

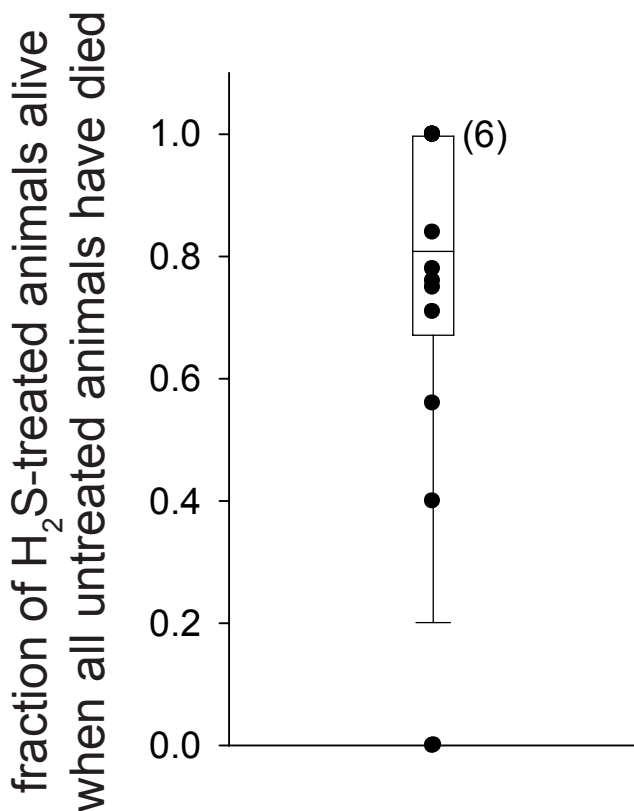

# B. Gompertz plot of lifespan data

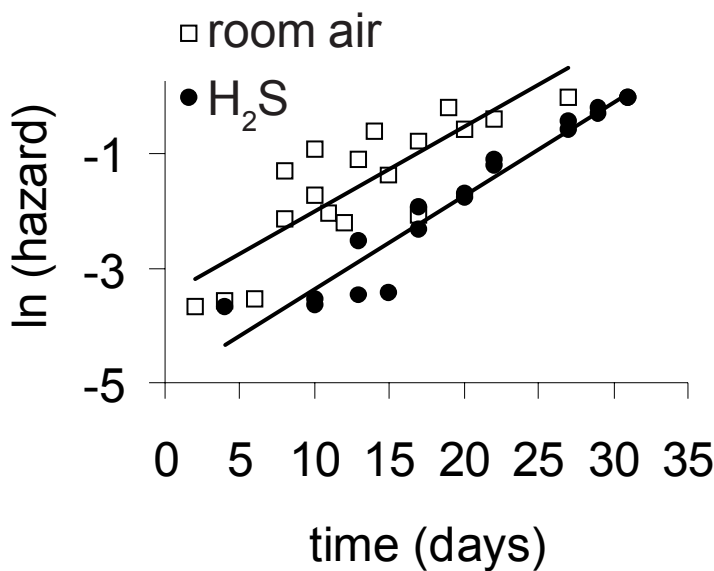

Supplement: supp_0710191104_10191Fig7.pdf [file supp_0710191104_10191Fig7.pdf]
